# Supplementary material for: Longitudinal patterns of health-related quality of life and dialysis modality: a national cohort study
Source: Springer Nature journal article supplement (doi:10.1186/s12882-018-1198-5), 2019-01-08
Supplement: MOESM1 [file 16385108]

**Table S1.** Baseline characteristics for home modality patients \*

| <b>Variables</b>                            | <b>Home PD<br/>(n=819)</b> | <b>Home HD<br/>(n=61)</b> | <b>p-value</b> |
|---------------------------------------------|----------------------------|---------------------------|----------------|
| Mean age (years)                            | 57.3 (15)                  | 56.1 (14)                 | <0.01          |
| Male                                        | 53                         | 69                        | 0.09           |
| Hispanic ethnicity                          | 8                          | 16                        | 0.01           |
| Black race                                  | 26                         | 15                        | 0.03           |
| Mean annual household income (dollars/year) | 50840 (19234)              | 50670 (14937)             | 0.93           |
| Education (bachelors and higher)            | 56                         | 53                        | <0.01          |
| Married                                     | 44                         | 52                        | 0.19           |
| Number of comorbidities                     | 15 (10)                    | 15 (11)                   | <0.01          |
| Catheter access use                         | 100                        | 28                        | <0.01          |
| Presence of any residual renal function     | 92                         | 41                        | <0.01          |
| Mean serum sodium (mmol/L)                  | 140.0 (2.9)                | 138.9 (3.1)               | <0.01          |
| Mean albumin (g/dL)                         | 3.7 (0.4)                  | 3.9 (0.4)                 | 0.06           |
| Mean hemoglobin (g/dL)                      | 11.1 (1.2)                 | 10.5 (1.1)                | <0.01          |
| Mean systolic blood pressure (mmHg)         | 141.1 (22.2)               | 147 (16.1)                | 0.42           |
| Mean body mass index (kg/m <sup>2</sup> )   | 30.0 (6.2)                 | 33.0 (8.2)                | 0.24           |
| Mean physical composite summary score (PCS) | 41.4 (10.4)                | 38.3 (11.8)               | <0.01          |
| Mean mental composite summary score (MCS)   | 51.3 (9.8)                 | 52.7 (8.6)                | 0.19           |
| Mean symptom problem score (SPS)            | 82.7 (13.5)                | 82.4 (12.5)               | <0.01          |
| Mean burden of kidney disease score (BKD)   | 58.7 (27.6)                | 48.1 (26.2)               | <0.01          |
| Mean effects of kidney disease score (EKD)  | 79.8 (17.7)                | 78.2 (18.3)               | <0.01          |

\*Categorical variables are presented as percentages; continuous variables are presented as mean (± standard deviation).
